# Supplementary material
Source: HighWire-hosted journal article supplement (https://thorax.bmj.com/content/thoraxjnl-2019-213281)

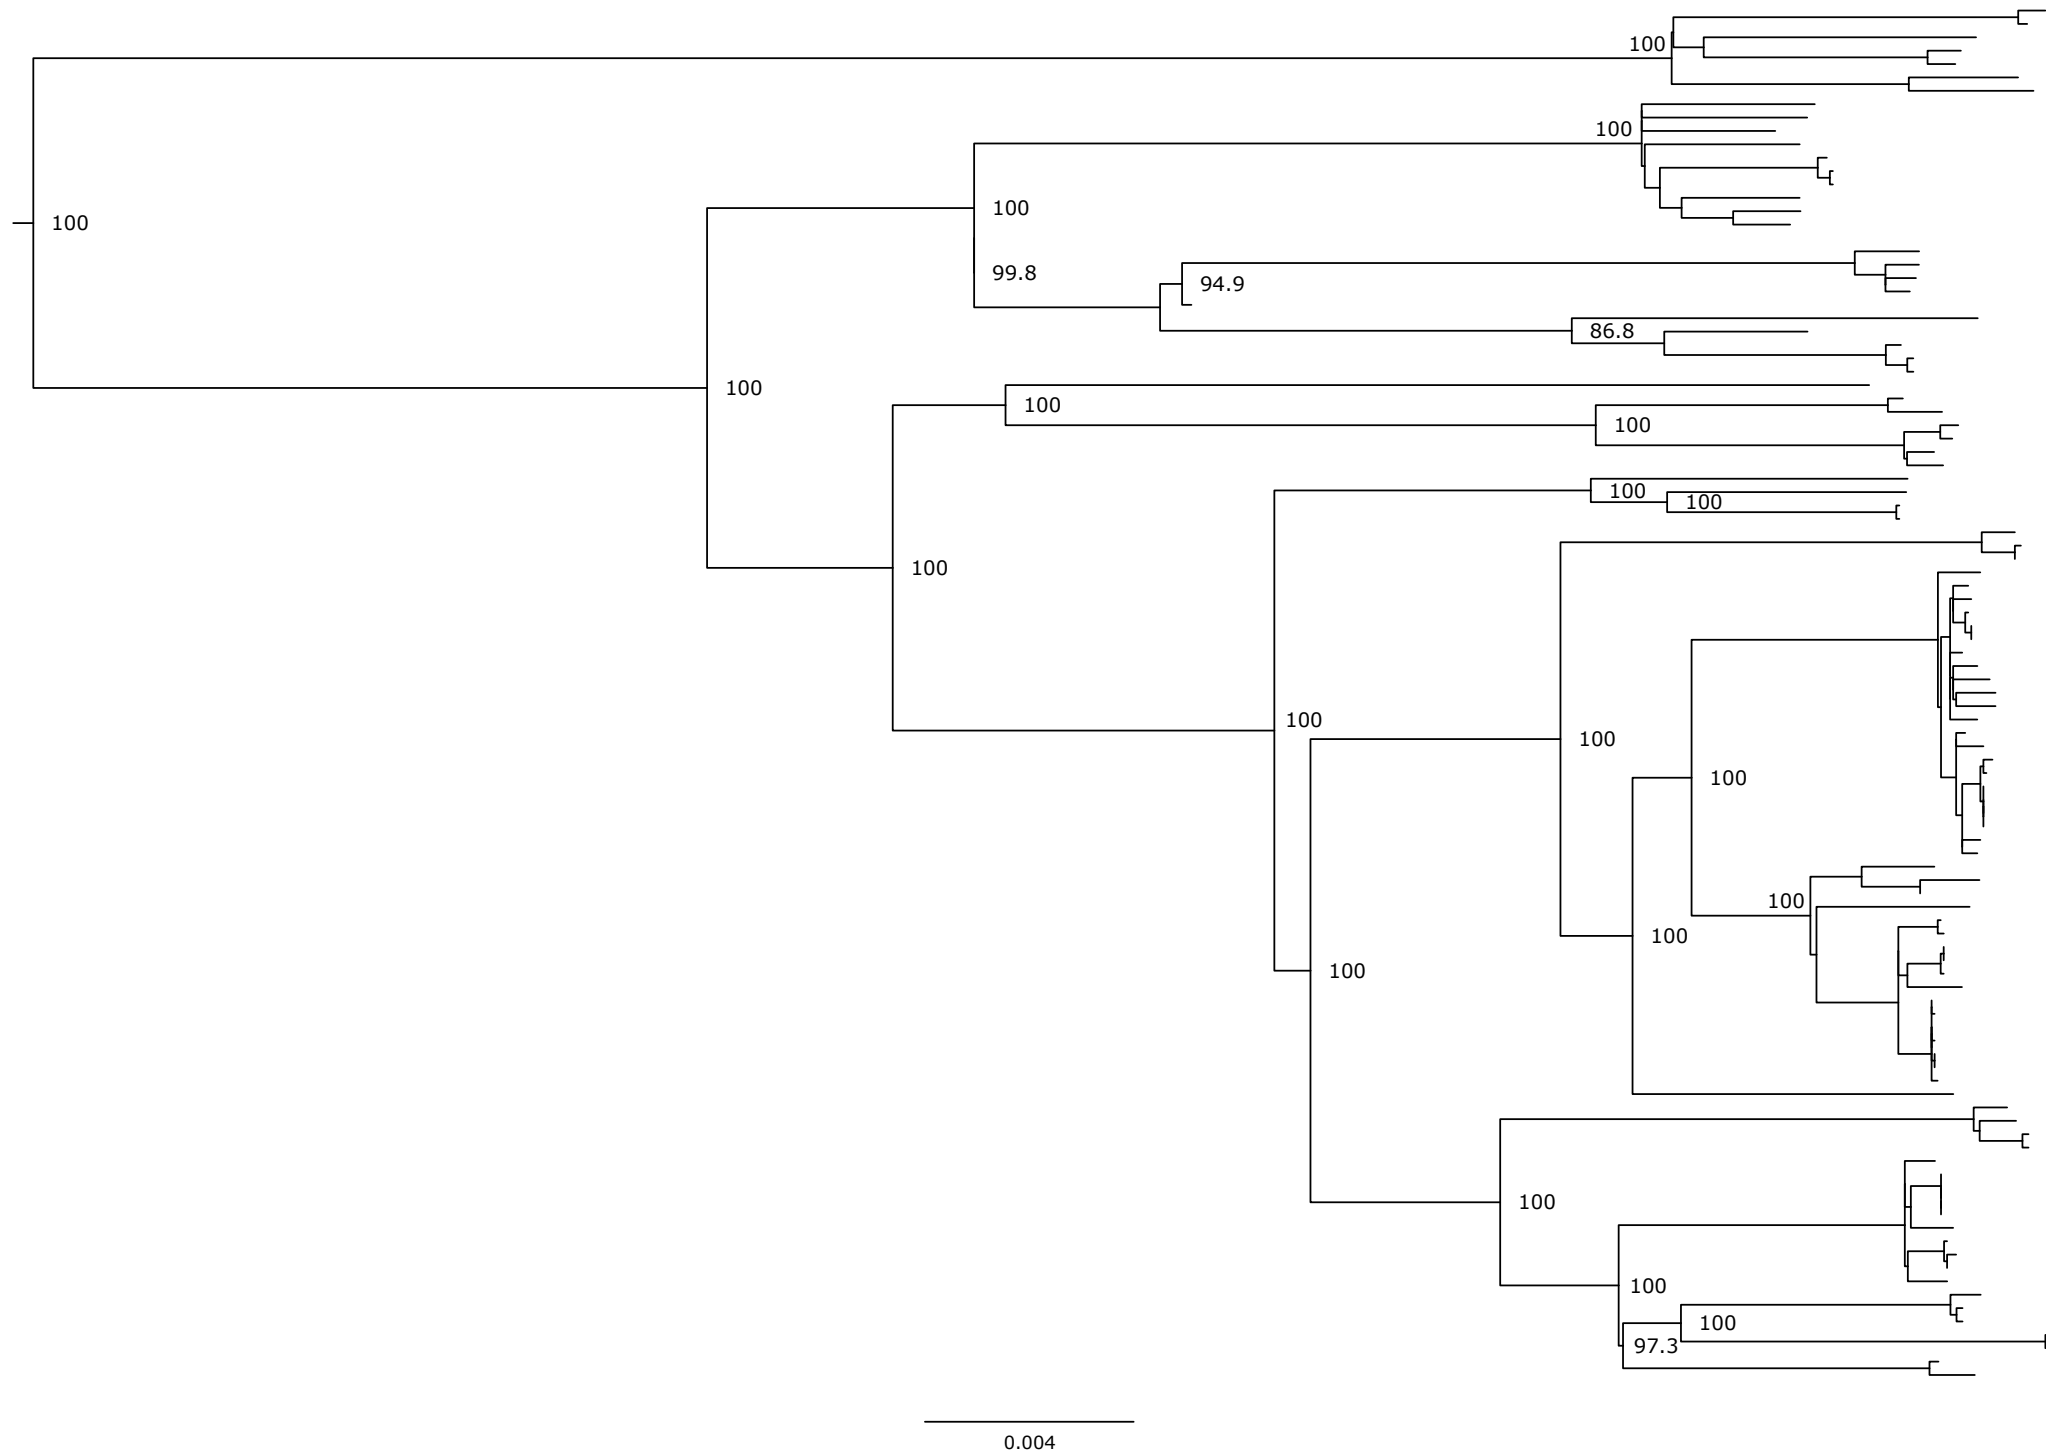

Supplement: inline-supplementary-material-2 [file inline-supplementary-material-2.pdf]

**Bland–Altman Plot for Comparison of 2 Observer Radiological Pathology Scores**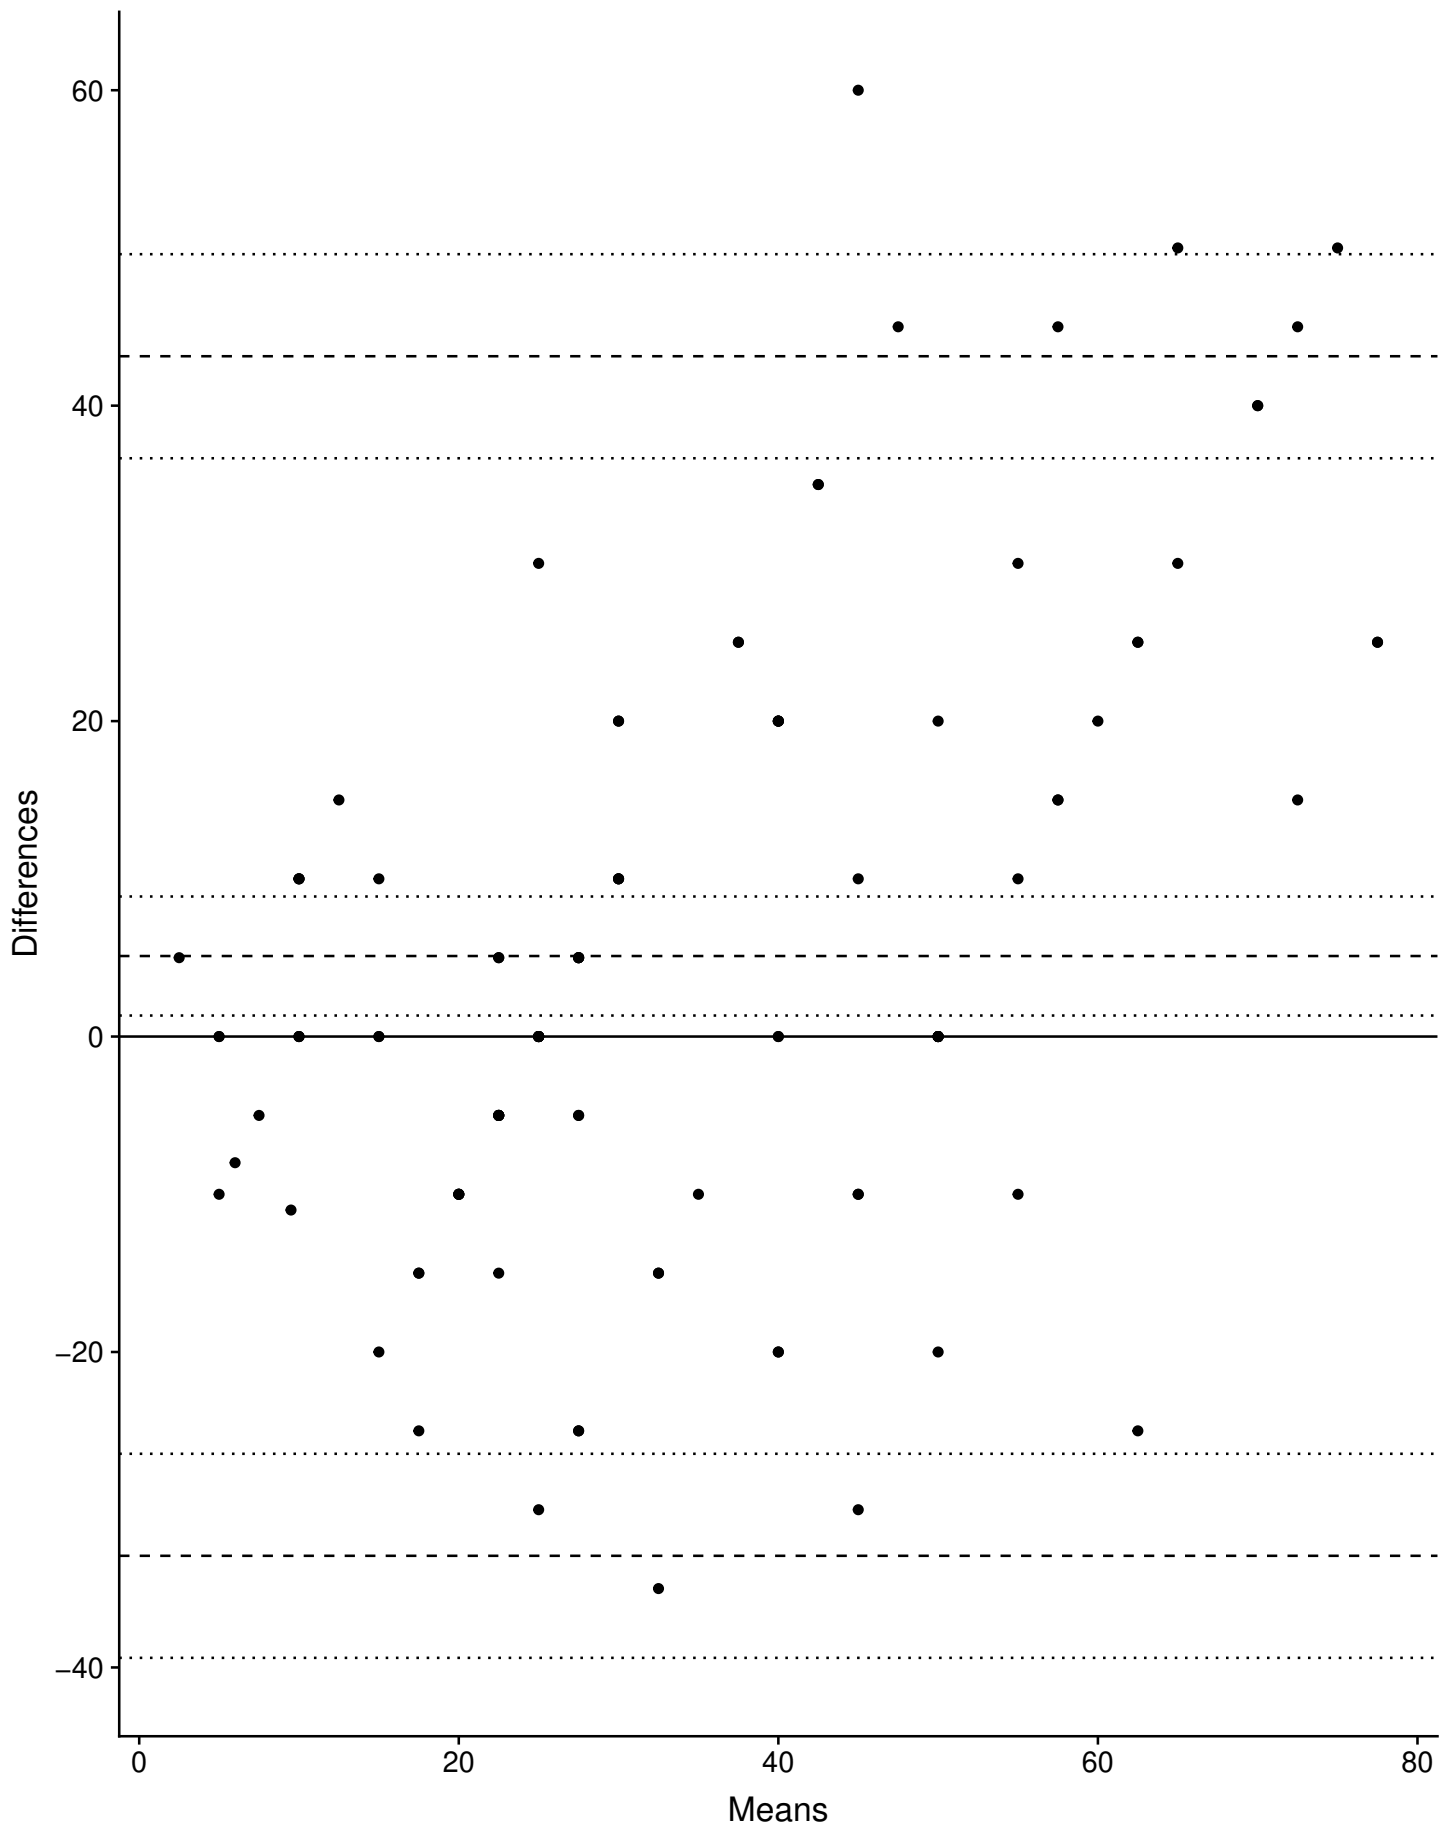

Supplement: inline-supplementary-material-3 [file inline-supplementary-material-3.pdf]
